# Supplementary material for: Moving an exercise referral scheme to remote delivery during the Covid-19 pandemic: an observational study examining the impact on uptake, adherence, outcomes, and costs
Source: Research Square preprint supplement (doi:10.21203/rs.3.rs-2670997/v1), 2023-04-25

# Probability (logit) of attending the 16-week consultation (adherence 2) predicted by pathway and WIMD quintile


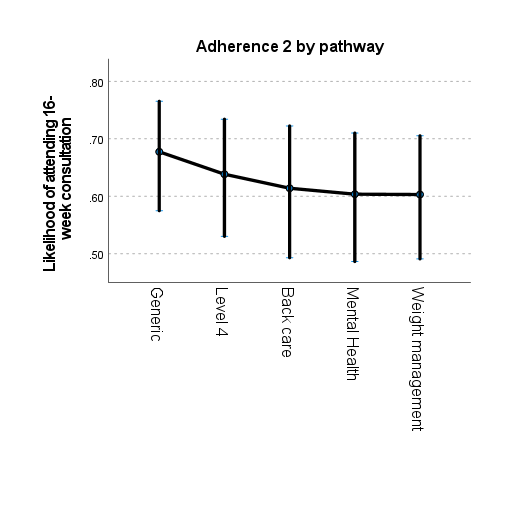


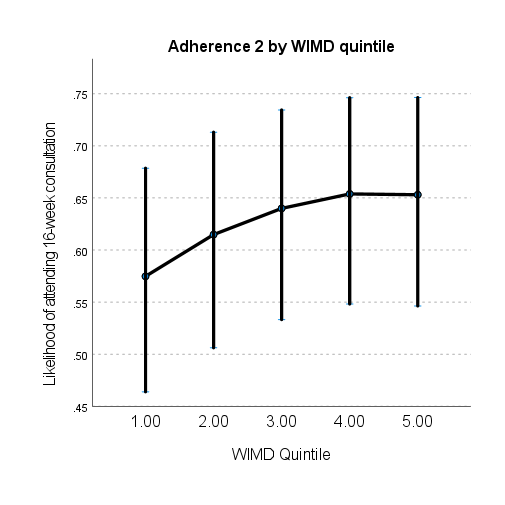

Supplement: Supplementary file 1 [file 6984f4290460fcf757d7339f.docx]
