# Supplementary material for: Moving an exercise referral scheme to remote delivery during the Covid-19 pandemic: an observational study examining the impact on uptake, adherence, outcomes, and costs
Source: Research Square preprint supplement (doi:10.21203/rs.3.rs-2670997/v1), 2023-04-25
Supplement: Supplementary file 4 [file 947917b6bb8051f165ce4ad9.docx]

# Data screening
