# Supplementary material for: Moving an exercise referral scheme to remote delivery during the Covid-19 pandemic: an observational study examining the impact on uptake, adherence, outcomes, and costs
Source: Research Square preprint supplement (doi:10.21203/rs.3.rs-2670997/v1), 2023-04-25
Supplement: Supplementary file 5 [file acd1f3ffdf718fe744f9ca8c.docx]

Supplementary Table 1. Multilevel binary logistic regression results for uptake measured as attendance at first consultation (uptake 1)

| **Characteristic** | **OR** | **Coefficient b** | **p-value** | **95% Confidence interval** | |
| --- | --- | --- | --- | --- | --- |
| Lower limit | Upper limit |
|  |  |  |  |  |  |
| **Delivery mode** (baseline face-to-face and remote combined) |  |  |  |  |  |
| Modified | 0.66 |  | **0.01** | 0.49 | 0.88 |
|  |  |  |  |  |  |
| **Sex** (baseline Male) |  |  |  |  |  |
| Female | 1.11 |  | **0.01** | 1.02 | 1.20 |
|  |  |  |  |  |  |
| **Age** |  | 0.019 | **<0.001** | 0.017 | 0.02 |
|  |  |  |  |  |  |
| **WIMD quintile** (baseline 1 – most deprived) |  |  |  |  |  |
| 2 | 1.11 |  | **0.02** | 1.01 | 1.21 |
| 3 | 1.22 |  | **<0.001** | 1.11 | 1.33 |
| 4 | 1.22 |  | **<0.001** | 1.12 | 1.34 |
| 5 (least deprived) | 1.33 |  | **<0.001** | 1.21 | 1.47 |
|  |  |  |  |  |  |
| **Pathway** (baseline Generic) |  |  |  |  |  |
| Back care | 1.09 |  | 0.42 | 0.88 | 1.35 |
| Level 4 | 1.28 |  | **<0.01** | 1.09 | 1.51 |
| Mental health | 0.87 |  | 0.14 | 0.72 | 1.05 |
| Weight management | 0.85 |  | 0.06 | 0.72 | 1.01 |
|  |  |  |  |  |  |
| **Referrer** (baseline GP) |  |  |  |  |  |
| Physiotherapist | 1.05 |  | 0.49 | 0.91 | 1.21 |
| Practice nurse | 1.07 |  | 0.37 | 0.92 | 1.25 |
| Other | 0.99 |  | 0.91 | 0.86 | 1.14 |
|  |  |  |  |  |  |

Bold values signify significant findings (p<0.05)

Supplementary Table 2 Multilevel binary logistic regression results for uptake measured as attendance at first exercise session (uptake 2)

| **Characteristic** | **OR** | **Coefficient b** | **p-value** | **95% Confidence interval** | |
| --- | --- | --- | --- | --- | --- |
| Lower limit | Upper limit |
|  |  |  |  |  |  |
| **Cohort** (baseline face-to-face and remote combined) |  |  |  |  |  |
| Modified | 0.94 |  | 0.82 | 0.52 | 1.67 |
|  |  |  |  |  |  |
| **Sex** (baseline Male) |  |  |  |  |  |
| Female | 1.11 |  | 0.20 | 0.94 | 1.32 |
|  |  |  |  |  |  |
| **Age** |  | 0.013 | **<0.001** | 0.007 | 0.018 |
|  |  |  |  |  |  |
| **WIMD quintile** (baseline 1 – most deprived) |  |  |  |  |  |
| 2 | 1.05 |  | 0.72 | 0.81 | 1.36 |
| 3 | 1.31 |  | **0.04** | 1.00 | 1.71 |
| 4 | 1.23 |  | 0.13 | 0.94 | 1.61 |
| 5 (least deprived) | 1.28 |  | 0.09 | 0.96 | 1.70 |
|  |  |  |  |  |  |
| **Pathway** (baseline Generic) |  |  |  |  |  |
| Back care | 1.06 |  | 0.81 | 0.68 | 1.63 |
| Level 4 | 1.10 |  | 0.53 | 0.82 | 1.47 |
| Mental health | 0.90 |  | 0.58 | 0.62 | 1.30 |
| Weight management | 0.82 |  | 0.22 | 0.60 | 1.12 |
|  |  |  |  |  |  |

Bold values signify significant findings (p<0.05)

Supplementary Table 3 Multilevel linear regression results for engagement measured as the total number of exercise sessions attended over the 16-week programme (adherence 1)

| **Characteristic** | **Coefficient b** | **p-value** | **95% Confidence interval** | |
| --- | --- | --- | --- | --- |
|  | Lower limit | Upper limit |
|  |  |  |  |  |
| **Delivery mode** (baseline face-to-face) |  |  |  |  |
| Remote | -3.81 | **<0.001** | -4.45 | -3.16 |
| Modified | 2.55 | **<0.001** | 1.43 | 3.68 |
|  |  |  |  |  |
| **Sex** (baseline Male) |  |  |  |  |
| Female | -1.11 | **<0.001** | -1.66 | -0.55 |
|  |  |  |  |  |
| **Age** (per year) | 0.01 | 0.34 | -0.01 | 0.03 |
|  |  |  |  |  |
| **WIMD quintile** (baseline 1 – most deprived) |  |  |  |  |
| 2 | -0.41 | 0.39 | -1.34 | 0.52 |
| 3 | 0.28 | 0.56 | -0.65 | 1.20 |
| 4 | -0.54 | 0.25 | -1.46 | 0.39 |
| 5 (least deprived) | 0.14 | 0.78 | -0.81 | 1.08 |
|  |  |  |  |  |
| **Pathway** (baseline Generic) |  |  |  |  |
| Back care | -1.29 | 0.18 | -0.27 | -2.74 |
| Level 4 | -1.51 | **<0.001** | -2.29 | -0.75 |
| Mental health | -0.71 | 0.26 | -1.95 | 0.54 |
| Weight management | -0.57 | 0.19 | -1.44 | 0.29 |

Bold values signify significant findings (p<0.05)

Supplementary Table 4 Multilevel binary logistic regression results for retention measured as attendance at 16-week consultation (adherence 2)

| **Characteristic** | **OR** | **p-value** | **95% Confidence interval** | |
| --- | --- | --- | --- | --- |
| Lower limit | Upper limit |
|  |  |  |  |  |
| **Delivery mode** (baseline face-to-face) |  |  |  |  |
| Remote | 1.52 | 0.15 | 0.86 | 2.70 |
| Modified | 0.89 | 0.71 | 0.48 | 1.64 |
|  |  |  |  |  |
| **Sex** (baseline Male) | 0.96 | 0.29 | 0.88 | 1.04 |
| Female |  |  |  |  |
|  |  |  |  |  |
| **Age** | 1.02 | **<0.001** | 1.01 | 1.02 |
|  |  |  |  |  |
| **WIMD quintile** (baseline 1 – most deprived) |  |  |  |  |
| 2 | 1.18 | **0.04** | 1.00 | 1.39 |
| 3 | 1.31 | **<0.01** | 1.12 | 1.55 |
| 4 | 1.40 | **<0.001** | 1.19 | 1.65 |
| 5 (least deprived) | 1.39 | **<0.001** | 1.17 | 1.66 |
|  |  |  |  |  |
| **Pathway** (baseline Generic) |  |  |  |  |
| Back care | 0.76 | **0.05** | 0.58 | 0.99 |
| Level 4 | 0.84 | 0.07 | 0.70 | 1.01 |
| Mental health | 0.73 | **0.01** | 0.57 | 0.93 |
| Weight management | 0.72 | **<0.01** | 0.59 | 0.89 |
|  |  |  |  |  |

Bold values signify significant findings (p<0.05)

Supplementary Table 5 Multilevel linear regression results for physical activity levels measured at 16 weeks

| **Characteristic** | **Coefficient b*** | **p-value** | **95% Confidence interval** | |
| --- | --- | --- | --- | --- |
|  | Lower limit | Upper limit |
|  |  |  |  |  |
| **Delivery mode** (baseline face-to-face) |  |  |  |  |
| Remote | -0.01 | 0.22 | -0.03 | 0.01 |
| Modified | 0.002 | 0.91 | -0.03 | 0.03 |
|  |  |  |  |  |
| **Sex** (baseline Male) |  |  |  |  |
| Female | 0.01 | 0.15 | -0.004 | 0.03 |
|  |  |  |  |  |
| **Age** | -0.0003 | 0.23 | -0.001 | 0.0002 |
|  |  |  |  |  |
| **WIMD quintile** (baseline 1 – most deprived) |  |  |  |  |
| 2 | 0.05 | **<0.01** | 0.02 | 0.07 |
| 3 | 0.04 | **0.01** | 0.01 | 0.07 |
| 4 | 0.06 | **<0.001** | 0.04 | 0.09 |
| 5 (least deprived) | 0.04 | **<0.01** | 0.01 | 0.07 |
|  |  |  |  |  |
| **Pathway** (baseline Generic) |  |  |  |  |
| Weight management | 0.02 | 0.06 | -0.001 | 0.05 |
| Mental health | 0.04 | **0.03** | 0.01 | 0.08 |
| Back care | 0.01 | 0.64 | -0.03 | -0.05 |
| Level 4 | -0.03 | **<0.01** | -0.05 | -0.01 |
|  |  |  |  |  |
| **SPAQ – initial** | 0.45 | **<0.001** | 0.43 | 0.47 |

Bold values signify significant findings (p<0.05)

*The dependent variable (physical activity at 16 weeks) was log transformed prior to analysis to obtain a normal distribution of residuals

Supplementary Table 6 Multilevel linear regression results for EQ-5D-5L index measured at 16 weeks

| **Characteristic** | **Coefficient b** | **p-value** | **95% Confidence interval** | |
| --- | --- | --- | --- | --- |
|  | Lower limit | Upper limit |
|  |  |  |  |  |
| **Delivery mode** (baseline face-to-face) |  |  |  |  |
| Remote | -0.005 | 0.23 | -0.01 | 0.003 |
| Modified | -0.004 | 0.61 | -0.02 | 0.01 |
|  |  |  |  |  |
| **Sex** (baseline Male) |  |  |  |  |
| Female | -0.005 | 0.23 | -0.01 | 0.003 |
|  |  |  |  |  |
| **Age** (per year) | -0.0008 | **<0.001** | -0.001 | -0.0005 |
|  |  |  |  |  |
| **WIMD quintile** (baseline 1 – most deprived) |  |  |  |  |
| 2 | 0.004 | 0.54 | -0.009 | 0.02 |
| 3 | 0.003 | 0.66 | -0.01 | 0.02 |
| 4 | 0.02 | **0.01** | 0.004 | 0.03 |
| 5 (least deprived) | 0.02 | **0.02** | 0.003 | 0.03 |
|  |  |  |  |  |
| **Pathway** (Baseline Generic) |  |  |  |  |
| Weight management | -0.009 | 0.14 | -0.02 | .003 |
| Mental health | -0.02 | 0.08 | -0.03 | 0.001 |
| Back care | -0.03 | **0.01** | -0.05 | -0.005 |
| Level 4 | -0.01 | **0.04** | -0.02 | -0.0006 |
|  |  |  |  |  |
| **EQ5D index – initial** | 0.55 | **<0.001** | 0.53 | 0.56 |

Bold values signify significant findings (p<0.05)

On average, patients at 16 weeks were recorded as having higher EQ-5D-5L index scores (M=0.77, SD=0.19) than at first consultation (M=0.68, SD=0.23). This difference (0.09, 95% CI: 0.09, 0.10) was significant (F(1,5640)=59.03, p<0.001) and represented a small effect size, ηp2 =0.01.

Supplementary Table7 Multilevel linear regression results for milli-QALY measured at 16 weeks

| **Characteristic** | **Coefficient b** | **p-value** | **95% Confidence interval** | |
| --- | --- | --- | --- | --- |
|  | Lower limit | Upper limit |
|  |  |  |  |  |
| **Delivery mode** (baseline face-to-face) |  |  |  |  |
| Remote | -4.46 | **0.03** | -2.80 | -0.12 |
| Modified | -0.60 | 0.61 | -2.88 | 1.68 |
|  |  |  |  |  |
| **Sex** (baseline Male) |  |  |  |  |
| Female | -0.72 | 0.23 | -1.9 | 0.46 |
|  |  |  |  |  |
| **Age** (per year) | -0.12 | **<0.001** | -0.16 | -0.08 |
|  |  |  |  |  |
| **WIMD quintile** (baseline 1 – most deprived) |  |  |  |  |
| 2 | 0.62 | 0.54 | -1.37 | 2.61 |
| 3 | 0.44 | 0.66 | -1.54 | 2.42 |
| 4 | 2.51 | **0.01** | 0.54 | 4.48 |
| 5 (least deprived) | 2.39 | **0.02** | 0.42 | 4.36 |
|  |  |  |  |  |
| **Pathway** (Baseline Generic) |  |  |  |  |
| Weight management | -1.34 | 0.14 | -3.12 | 0.43 |
| Mental health | -2.36 | 0.08 | -4.99 | 0.27 |
| Back care | -3.94 | **0.01** | -7.08 | -0.80 |
| Level 4 | -1.62 | **0.04** | -3.15 | -0.10 |
|  |  |  |  |  |
| **EQ5D index – initial** | 237.24 | **<0.001** | 234.72 | 239.76 |

Bold values signify significant findings (p<0.05)

Supplementary Table 8 Multilevel linear regression results for BMI scores measured at 16 weeks

| **Characteristic** | **Coefficient b** | **p-value** | **95% Confidence interval** | |
| --- | --- | --- | --- | --- |
|  | Lower limit | Upper limit |
|  |  |  |  |  |
| **Delivery mode** (baseline face-to-face) |  |  |  |  |
| Remote | -0.004 | 0.95 | -0.13 | 0.12 |
| Modified | -0.09 | 0.44 | -0.33 | 0.14 |
|  |  |  |  |  |
| **Sex** (baseline Male) |  |  |  |  |
| Female | 0.23 | **<0.001** | 0.12 | 0.35 |
|  |  |  |  |  |
| **Age** (per year) | 0.01 | **<0.001** | 0.003 | 0.01 |
|  |  |  |  |  |
| **WIMD quintile** (baseline 1 – most deprived) |  |  |  |  |
| 2 | -0.06 | 0.56 | -0.25 | 0.14 |
| 3 | -0.04 | 0.67 | -0.23 | 0.15 |
| 4 | -0.15 | 0.12 | -0.34 | 0.04 |
| 5 (least deprived) | -0.24 | **0.01** | -0.43 | -0.05 |
|  |  |  |  |  |
| **Pathway** (Baseline Generic) |  |  |  |  |
| Weight management | 0.03 | 0.75 | -0.15 | 0.21 |
| Mental health | 0.02 | 0.85 | -0.22 | 0.27 |
| Back care | -0.05 | 0.75 | -0.38 | 0.28 |
| Level 4 | 0.16 | 0.06 | 0.01 | 0.33 |
|  |  |  |  |  |
| **BMI – initial** | 0.90 | **<0.001** | 0.89 | 0.91 |

Bold values signify significant findings (p<0.05)

Supplementary Table 9 Multilevel linear regression results for systolic blood pressure measured at 16 weeks

| **Characteristic** | **Coefficient b** | **p-value** | **95% Confidence interval** | |
| --- | --- | --- | --- | --- |
|  | Lower limit | Upper limit |
|  |  |  |  |  |
| **Delivery mode** (baseline face-to-face) |  |  |  |  |
| Remote | 0.15 | 0.58 | -0.38 | 0.68 |
| Modified | 0.68 | 0.17 | -0.30 | 1.67 |
|  |  |  |  |  |
| **Sex** (baseline Male) |  |  |  |  |
| Female | -1.08 | **<0.001** | -1.56 | -0.60 |
|  |  |  |  |  |
| **Age** (per year) | 0.07 | **<0.001** | 0.05 | 0.08 |
|  |  |  |  |  |
| **WIMD quintile** (baseline 1 – most deprived) |  |  |  |  |
| 2 | -0.20 | 0.63 | -0.10 | 0.61 |
| 3 | 0.65 | 0.11 | -0.14 | 1.45 |
| 4 | 0.42 | 0.29 | -0.37 | 1.21 |
| 5 (least deprived) | -0.24 | 0.55 | -1.03 | 0.55 |
|  |  |  |  |  |
| **Pathway** (Baseline Generic) |  |  |  |  |
| Weight management | 0.50 | 0.18 | -0.23 | 1.24 |
| Mental health | 1.46 | **0.01** | 0.37 | 2.54 |
| Back care | 0.73 | 0.26 | -0.55 | 2.02 |
| Level 4 | -0.50 | 0.10 | -1.11 | 0.10 |
|  |  |  |  |  |
| **Systolic blood pressure – initial** | 0.63 | **<0.001** | 0.62 | 0.65 |

Bold values signify significant findings (p<0.05)

Supplementary Table 10 Multilevel linear regression results for resting heart rate measured at 16 weeks

| **Characteristic** | **Coefficient b** | **p-value** | **95% Confidence interval** | |
| --- | --- | --- | --- | --- |
|  | Lower limit | Upper limit |
|  |  |  |  |  |
| **Delivery mode** (baseline face-to-face) |  |  |  |  |
| Remote | 0.42 | **0.03** | 0.05 | 0.79 |
| Modified | -0.21 | 0.54 | -0.91 | 0.48 |
|  |  |  |  |  |
| **Sex** (baseline Male) |  |  |  |  |
| Female | 0.15 | 0.38 | -0.19 | 0.49 |
|  |  |  |  |  |
| **Age** (per year) | 0.001 | 0.81 | -0.01 | 0.01 |
|  |  |  |  |  |
| **WIMD quintile** (baseline 1 – most deprived) |  |  |  |  |
| 2 | 0.43 | 0.13 | -0.13 | 0.10 |
| 3 | 0.09 | 0.75 | -0.47 | 0.65 |
| 4 | -0.26 | 0.36 | -0.82 | 0.30 |
| 5 (least deprived) | -0.22 | 0.44 | -0.78 | 0.34 |
|  |  |  |  |  |
| **Pathway** (Baseline Generic) |  |  |  |  |
| Weight management | 0.27 | 0.30 | -0.24 | 0.79 |
| Mental health | -0.21 | 0.58 | -0.98 | 0.55 |
| Back care | -0.27 | 0.56 | -1.181 | 0.63 |
| Level 4 | -0.45 | **0.04** | -0.87 | -0.02 |
|  |  |  |  |  |
| **Resting heart rate – initial** | 0.65 | **<0.001** | 0.64 | 0.67 |

Bold values signify significant findings (p<0.05)
