# Supplementary material for: Moving an exercise referral scheme to remote delivery during the Covid-19 pandemic: an observational study examining the impact on uptake, adherence, outcomes, and costs
Source: Research Square preprint supplement (doi:10.21203/rs.3.rs-2670997/v1), 2023-04-25
Supplement: Supplementary file 6 [file ba8849af70abb848f200ef3f.docx]

Supplementary Table 1. Pathways available within the Welsh National Exercise Referral Scheme (NERS)

| **Pathway** | **Grouping** |
| --- | --- |
| Back care | Back care |
| Cancer | Level 4 |
| Cardiac | Level 4 |
| Falls prevention | Level 4 |
| Generic | Generic |
| Lifestyle (for patients awaiting hip/knee replacement) | Level 4 |
| Mental health | Mental health |
| Pregnancy | Level 4 |
| Pulmonary | Level 4 |
| Stroke | Level 4 |
| Weight management | Weight management |
