# Supplementary material for: Moving an exercise referral scheme to remote delivery during the Covid-19 pandemic: an observational study examining the impact on uptake, adherence, outcomes, and costs
Source: Research Square preprint supplement (doi:10.21203/rs.3.rs-2670997/v1), 2023-04-25
Supplement: Supplementary file 7 [file ca693d39fd6495352dab382c.docx]

# Supplementary Table 1. Rules applied to assign patients to delivery mode

| **Patient status** | **Status description** | **Timing of referral / first consultation** | **Timing of 16-week consultation / withdrawal** | **Delivery mode** | **n** |
| --- | --- | --- | --- | --- | --- |
| 16-week consultation | Patient completed the programme – data for 16-week consultation recorded; no 52-week data | First consultation *before* service suspended | Date of 16-week consultation *before* service suspended | Face-to-face | 2,575 |
| Date of 16-week consultation *after* service suspended | Remote | 1,298 |
| First consultation *after* service resumed |  | Modified | 515 |
| 52-week consultation | Patient completed the programme – data for 16-week and 52-week consultation recorded | First consultation *before* service suspended | Date of 16-week consultation *before* service suspended | Face-to-face | 2,519 |
| Date of 16-week consultation *after* service suspended | Remote | 1,406 |
| First consultation *after* service resumed |  | Modified | 0 |
| Withdrawn | Patient withdrew from the programme at some point between first and 16-week consultation | First consultation *before* service suspended | Date of withdrawal *before* service suspended | Face-to-face | 4,277 |
| Date of withdrawal *after* service suspended | Remote | 1,464 |
| First consultation *after* service resumed |  | Modified | 376 |
| Did not take up programme | Patient referred but did not take up programme; no data for first consultation | Referral *before* service suspended |  | Face-to-face | 13,379 |
| Referral *after* service suspended |  | Modified | 1,108 |
| Total | | | | | 28,917 |
