# Supplementary material for: Moving an exercise referral scheme to remote delivery during the Covid-19 pandemic: an observational study examining the impact on uptake, adherence, outcomes, and costs
Source: Research Square preprint supplement (doi:10.21203/rs.3.rs-2670997/v1), 2023-04-25
Supplement: Supplementary file 8 [file edef22560b755b9389560d13.docx]

## Frequency distribution for the number of recorded sessions attended by patients completing the programme


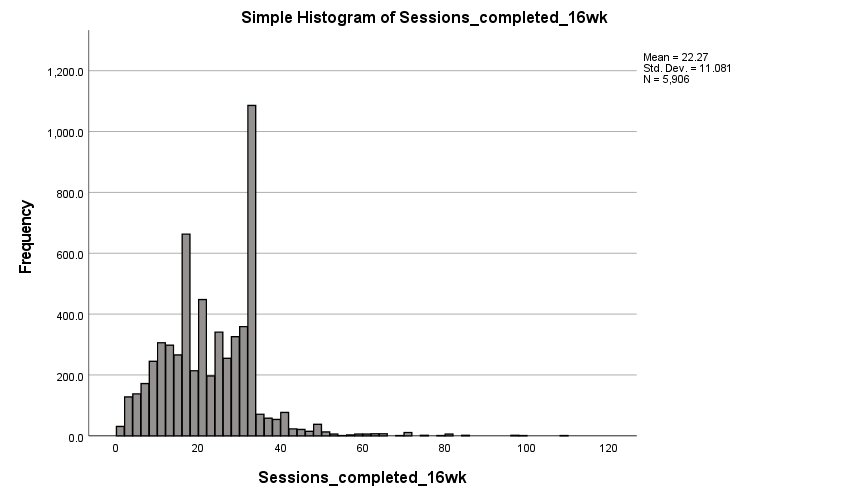


Peaks are observed at 16 weeks and 32 weeks which likely reflect groups of patients choosing to attend once and twice per week respectively over the 16-week programme.
