# Supplementary material for: Moving an exercise referral scheme to remote delivery during the Covid-19 pandemic: an observational study examining the impact on uptake, adherence, outcomes, and costs
Source: Research Square preprint supplement (doi:10.21203/rs.3.rs-2670997/v1), 2023-04-25
Supplement: Supplementary file 10 [file fda211180fe4d8666fa99c06.docx]

# Probability (logit) of attending first consultation (uptake - consultation) predicted by delivery mode, gender, referral reason, and WIMD quintile

| 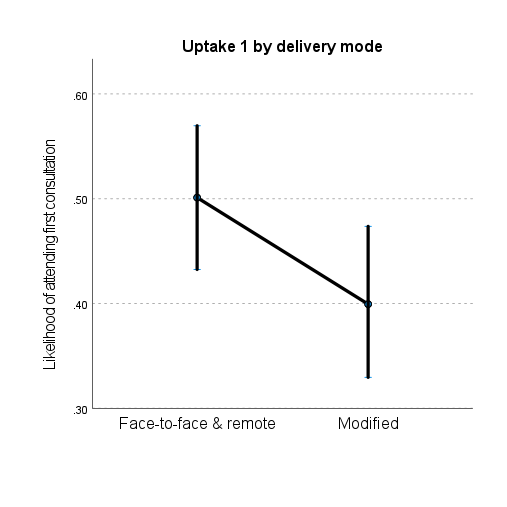 | 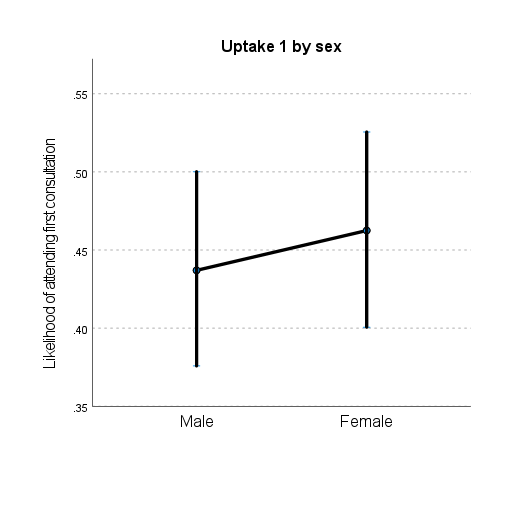 |
| --- | --- |
| 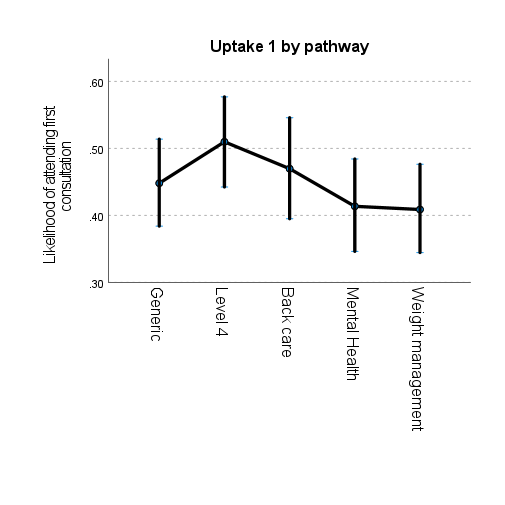 | 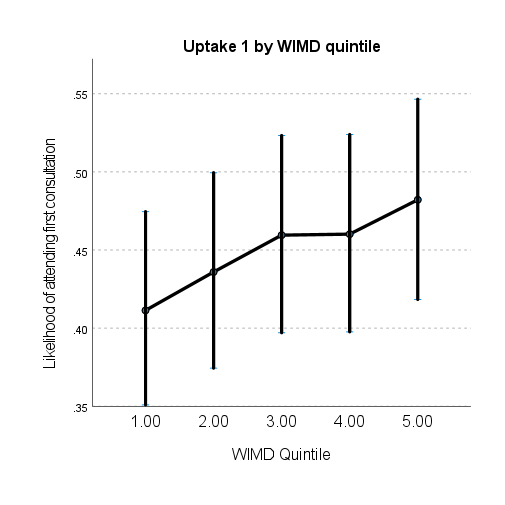 |
