# Supplementary figures and images for: Moving an exercise referral scheme to remote delivery during the Covid-19 pandemic: an observational study examining the impact on uptake, adherence, outcomes, and costs
Source: Research Square preprint supplement (doi:10.21203/rs.3.rs-2670997/v1), 2023-04-25

# Matrix used to determine delivery via the NERS ‘modified’ programme


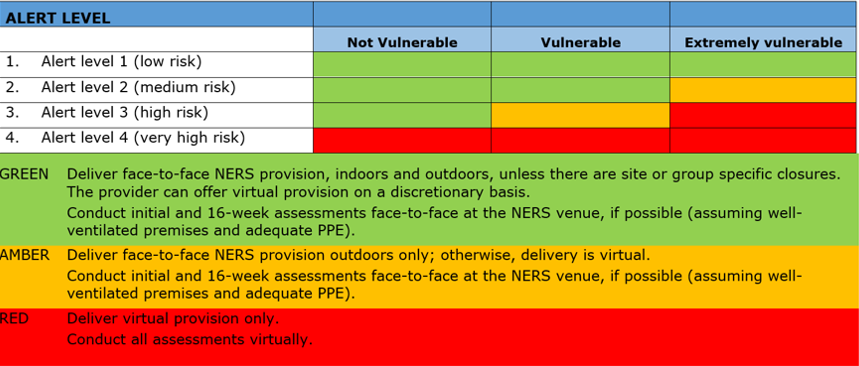

Supplement: Supplementary file 9 [file f5b577a6bf251f8987567fcc.docx]
